# Supplementary material
Source: PubMed Central journal article supplement (PMC8617516)
Supplement: pnas.2107543118.sapp.pdf [file pnas.2107543118.sapp.pdf]

# PNAS

[www.pnas.org](http://www.pnas.org)

## Supplementary Information for

Regulation of interference-sensitive crossover distribution ensures  
crossover assurance in *Arabidopsis*

Xiang Li, Jun Zhang, Jiyue Huang, Jing Xu, Zhiyu Chen, Gregory P. Copenhaver, and Yingxiang Wang\*

Yingxiang Wang  
Email: [yx\\_wang@fudan.edu.cn](mailto:yx_wang@fudan.edu.cn).

### This PDF file includes:

Figures S1 to S4  
Tables S1 to S3

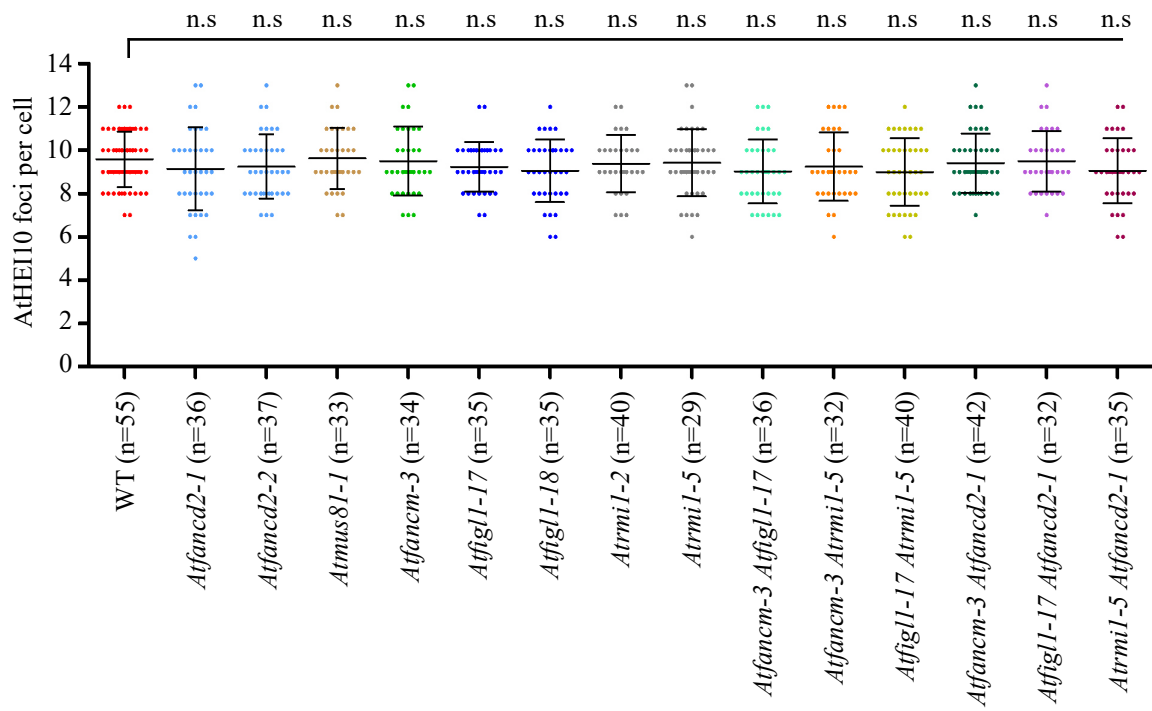

**Fig. S1.** Statistical analysis of the number of AtHEI10 foci per cell at diakinesis in the genotypes analyzed in this study. Error bars indicate SD. n.s., not significant, two-tailed Mann Whitney test. n, the number of cells analyzed.

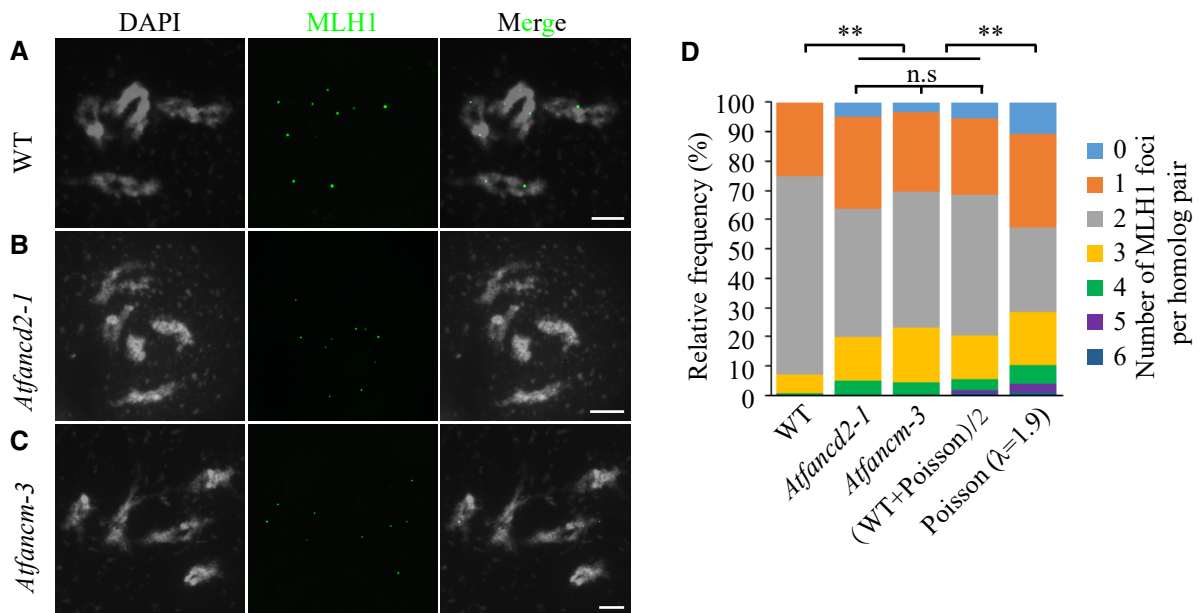

**Fig. S2** The distribution pattern of AtMLH1 foci in WT, *Atfaned2-1* and *Atfanem-3*.

(A-C) Immunostaining of AtMLH1 at diakinesis in WT, *Atfaned2-1* and *Atfanem-3*. DAPI stained chromosomes are shown in white and AtMLH1 foci are shown in green. (D) Distributions of the number of AtMLH1 foci on pairs of homologous chromosome pairs (bivalents) in WT, *Atfaned2-1* and *Atfanem-3*. n.s not significant, \*\*  $P < 0.01$  Chi-square test. Bars = 5  $\mu$ m.

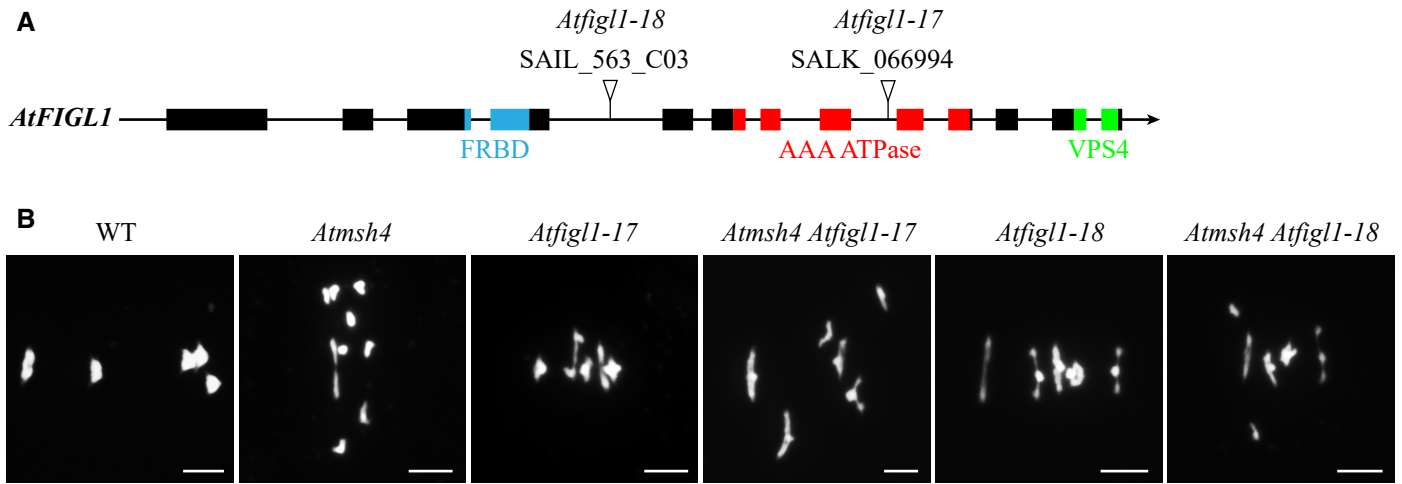

**Fig. S3** Validation of two new *Atfigl1* alleles.

(A) Schematic positions of the T-DNA insertions in the *Atfigl1-17* and *Atfigl1-18* alleles. The blue, red and green rectangles indicate FRBD, AAA ATPase and VPS4 domains, respectively. The triangles indicate the positions of the T-DNA insertion.

(B) Chromosome morphologies of WT, *Atmsh4*, *Atfigl1-17*, *Atmsh4 Atfigl1-17*, *Atfigl1-18* and *Atmsh4 Atfigl1-18* at metaphase I. Bars = 5  $\mu$ m.

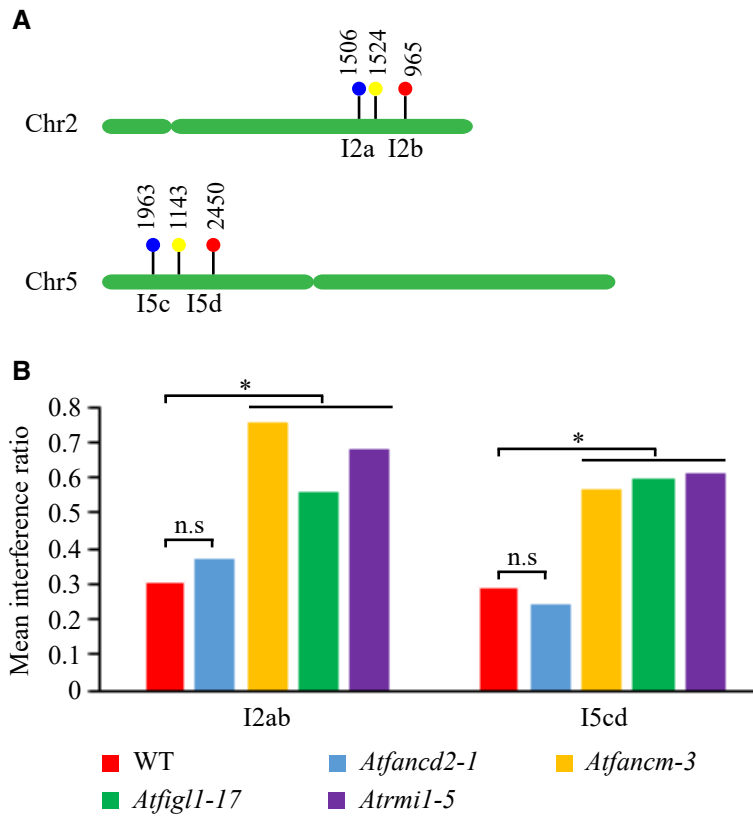

**Fig. S4** CO interference analysis in WT, *Atfand2-1*, *Atfancm-3*, *Atfigl1-17* and *Atrmi1-5*.  
 (A) Positions of intervals I2a, I2b, I5c and I5d in chromosomes marked by fluorescent proteins.  
 (B) Interference ratio (IR) was measured in two pairs of intervals I2ab and I5cd in WT, *Atfand2-1*, *Atfancm-3*, *Atfigl1-17* and *Atrmi1-5*. The interference ratio is closer to 1, the interference is weaker. Using the raw data from table S2, calculations and statistical analyses have been performed according to Stahl Lab Online tools (<https://elizabethhousworth.com/StahlLabOnlineTools/>). n.s not significant, \* significant.

**Table S1.** P values for Chi-square test between the distribution of AtHEI10 foci among chromosomes in genotypes analyzed in this study.

|                              | WT<br>(n = 275) | <i>Atmus81-1</i><br>(n = 165) | <i>Atfancd2-1</i><br>(n = 180) | <i>Atfancd2-2</i> (n = 185) | <i>Atfancm-3</i> (n = 170) | <i>Atfigl1-17</i> (n = 165) | <i>Atfigl1-18</i> (n = 175) | <i>Atrmi1-2</i> (n = 200) | <i>Atrmi1-5</i> (n = 145) | <i>Atfanm-3 Atfigl1-17</i> (n = 180) | <i>Atfanm-3 Atrmi1-5</i> (n = 160) | <i>Atfigl1-17 Atrmi1-5</i> (n = 195) | <i>Atfanm-3 Atfancd2-1</i> (n = 210) | <i>Atfigl1-17 Atfancd2-1</i> (n = 160) | <i>Atrmi1-5 Atfancd2-1</i> (n = 175) | (WT + Poisson)/2 |
|------------------------------|-----------------|-------------------------------|--------------------------------|-----------------------------|----------------------------|-----------------------------|-----------------------------|---------------------------|---------------------------|--------------------------------------|------------------------------------|--------------------------------------|--------------------------------------|----------------------------------------|--------------------------------------|------------------|
| <i>Atmus81-1</i>             | 0.671           |                               |                                |                             |                            |                             |                             |                           |                           |                                      |                                    |                                      |                                      |                                        |                                      |                  |
| <i>Atfancd2-1</i>            | 5.15E-05        | 0.002                         |                                |                             |                            |                             |                             |                           |                           |                                      |                                    |                                      |                                      |                                        |                                      |                  |
| <i>Atfancd2-2</i>            | 1.81E-04        | 0.005                         | 0.872                          |                             |                            |                             |                             |                           |                           |                                      |                                    |                                      |                                      |                                        |                                      |                  |
| <i>Atfanm-3</i>              | 2.72E-04        | 0.010                         | 0.327                          | 0.760                       |                            |                             |                             |                           |                           |                                      |                                    |                                      |                                      |                                        |                                      |                  |
| <i>Atfigl1-17</i>            | 0.003           | 0.037                         | 0.316                          | 0.914                       | 0.845                      |                             |                             |                           |                           |                                      |                                    |                                      |                                      |                                        |                                      |                  |
| <i>Atfigl1-18</i>            | 0.001           | 0.019                         | 0.833                          | 0.844                       | 0.633                      | 0.714                       |                             |                           |                           |                                      |                                    |                                      |                                      |                                        |                                      |                  |
| <i>Atrmi1-2</i>              | 3.70E-05        | 0.003                         | 0.497                          | 0.130                       | 0.603                      | 0.205                       | 0.586                       |                           |                           |                                      |                                    |                                      |                                      |                                        |                                      |                  |
| <i>Atrmi1-5</i>              | 0.001           | 0.011                         | 0.817                          | 0.987                       | 0.796                      | 0.934                       | 0.856                       | 0.152                     |                           |                                      |                                    |                                      |                                      |                                        |                                      |                  |
| <i>Atfanm-3 Atfigl1-17</i>   | 0.003           | 0.029                         | 0.651                          | 0.860                       | 0.664                      | 0.874                       | 0.975                       | 0.858                     | 0.640                     |                                      |                                    |                                      |                                      |                                        |                                      |                  |
| <i>Atfanm-3 Atrmi1-5</i>     | 0.002           | 0.040                         | 0.373                          | 0.701                       | 0.947                      | 0.848                       | 0.821                       | 0.764                     | 0.513                     | 0.806                                |                                    |                                      |                                      |                                        |                                      |                  |
| <i>Atfigl1-17 Atrmi1-5</i>   | 0.001           | 0.014                         | 0.888                          | 0.758                       | 0.488                      | 0.521                       | 0.995                       | 0.764                     | 0.434                     | 0.904                                | 0.618                              |                                      |                                      |                                        |                                      |                  |
| <i>Atfanm-3 Atfancd2-1</i>   | 0.002           | 0.019                         | 0.847                          | 0.755                       | 0.300                      | 0.460                       | 0.814                       | 0.757                     | 0.499                     | 0.733                                | 0.367                              | 0.849                                |                                      |                                        |                                      |                  |
| <i>Atfigl1-17 Atfancd2-1</i> | 1.31E-05        | 0.001                         | 0.787                          | 0.887                       | 0.331                      | 0.350                       | 0.579                       | 0.771                     | 0.940                     | 0.490                                | 0.423                              | 0.499                                | 0.675                                |                                        |                                      |                  |
| <i>Atrmi1-5 Atfancd2-1</i>   | 4.35E-04        | 0.013                         | 0.562                          | 0.876                       | 0.930                      | 0.871                       | 0.935                       | 0.866                     | 0.191                     | 0.917                                | 0.983                              | 0.787                                | 0.242                                | 0.130                                  |                                      |                  |
| (WT + Poisson)/2             | 0.004           | 0.035                         | 0.523                          | 0.920                       | 0.706                      | 0.971                       | 0.735                       | 0.975                     | 0.124                     | 0.841                                | 0.729                              | 0.607                                | 0.618                                | 0.492                                  | 0.784                                |                  |
| Poisson ( $\lambda = 1.9$ )  | 2.22E-14        | 1.04E-10                      | 0.001                          | 0.002                       | 0.003                      | 0.001                       | 0.001                       | 0.009                     | 0.001                     | 3.90E-04                             | 0.001                              | 0.001                                | 3.940E-04                            | 0.003                                  | 0.003                                | 0.004            |

| <b>Table S2.</b> Raw data of FTL analyses in four intervals |                              |      |     |     |    |    |    |    |    |   |   |   |   |       |
|-------------------------------------------------------------|------------------------------|------|-----|-----|----|----|----|----|----|---|---|---|---|-------|
| Intervals                                                   | Genotypes                    | A    | B   | C   | D  | E  | F  | G  | H  | I | J | K | L | total |
| I2ab                                                        | WT                           | 2085 | 205 | 141 | 1  | 1  | 1  | 1  | 0  | 0 | 0 | 0 | 0 | 2435  |
|                                                             | <i>Atfancd2-1</i>            | 1105 | 105 | 60  | 2  | 0  | 0  | 0  | 0  | 0 | 0 | 0 | 0 | 1272  |
|                                                             | <i>Atfanm-3</i>              | 1239 | 255 | 126 | 5  | 0  | 4  | 13 | 6  | 2 | 0 | 0 | 0 | 1650  |
|                                                             | <i>Atfanm-3 Atfancd2-1</i>   | 1436 | 234 | 104 | 3  | 1  | 4  | 5  | 0  | 0 | 0 | 0 | 0 | 1787  |
|                                                             | <i>Atfigl1-17</i>            | 1648 | 304 | 153 | 4  | 1  | 4  | 8  | 7  | 3 | 0 | 0 | 0 | 2132  |
|                                                             | <i>Atfigl1-17 Atfancd2-1</i> | 1437 | 330 | 156 | 5  | 2  | 3  | 9  | 8  | 3 | 0 | 0 | 0 | 1953  |
|                                                             | <i>Atrmi1-5</i>              | 1540 | 232 | 125 | 4  | 3  | 2  | 5  | 5  | 1 | 0 | 0 | 0 | 1917  |
|                                                             | <i>Atrmi1-5 Atfancd2-1</i>   | 1611 | 379 | 170 | 10 | 7  | 8  | 7  | 5  | 3 | 0 | 0 | 0 | 2200  |
| I5cd                                                        | WT                           | 869  | 139 | 117 | 2  | 1  | 2  | 0  | 0  | 1 | 0 | 0 | 0 | 1131  |
|                                                             | <i>Atfancd2-1</i>            | 823  | 99  | 112 | 1  | 1  | 1  | 0  | 0  | 0 | 0 | 0 | 0 | 1037  |
|                                                             | <i>Atfanm-3</i>              | 1193 | 379 | 289 | 15 | 16 | 12 | 17 | 16 | 4 | 0 | 0 | 0 | 1941  |
|                                                             | <i>Atfanm-3 Atfancd2-1</i>   | 1238 | 260 | 213 | 13 | 11 | 8  | 12 | 10 | 3 | 0 | 0 | 0 | 1768  |
|                                                             | <i>Atfigl1-17</i>            | 1003 | 280 | 187 | 8  | 7  | 10 | 12 | 11 | 5 | 0 | 0 | 0 | 1523  |
|                                                             | <i>Atfigl1-17 Atfancd2-1</i> | 1018 | 315 | 248 | 9  | 7  | 13 | 17 | 16 | 9 | 1 | 0 | 0 | 1653  |
|                                                             | <i>Atrmi1-5</i>              | 1411 | 273 | 256 | 7  | 5  | 11 | 10 | 7  | 4 | 0 | 0 | 0 | 1984  |
|                                                             | <i>Atrmi1-5 Atfancd2-1</i>   | 1308 | 391 | 324 | 8  | 9  | 13 | 18 | 14 | 8 | 1 | 0 | 0 | 2094  |

| <b>Table S3.</b> The sequences of primers used in this study. |                                   |
|---------------------------------------------------------------|-----------------------------------|
| <i>Atfancd2-1</i> LP                                          | AATTCACCGGAATGTCACAAC             |
| <i>Atfancd2-1</i> RP                                          | AAAAGAATCACCCTTGCACG              |
| <i>Atfancd2-2</i> LP                                          | ATTTAAGTTCAGGCCTCTTCTTCC          |
| <i>Atfancd2-2</i> RP                                          | CCCAGTTTGGCATGTAGATTG             |
| <i>Atmus81-1</i> LP                                           | TGGTGAAATCTAGCAACCCAG             |
| <i>Atmus81-1</i> RP                                           | AATTTTCCACAAACCCTTTGG             |
| <i>Atmsh4</i> LP                                              | CGGCTTCACTGCATCTATCTC             |
| <i>Atmsh4</i> RP                                              | TGGAATGGATCAATGAGTTCC             |
| <i>Atfancm-3</i> LP                                           | CACTCGAGCAATCTCCAAGTC             |
| <i>Atfancm-3</i> RP                                           | TCTTGCCGGAATACATCTCAC             |
| <i>Atfigl1-17</i> LP                                          | TTTCAAAGGTTGTCGTTCCACC            |
| <i>Atfigl1-17</i> RP                                          | CCTTCCGTTAGGTTGCATATG             |
| <i>Atfigl1-18</i> LP                                          | TCAGGAAGAACGGCATGATAC             |
| <i>Atfigl1-18</i> RP                                          | AATGGGCATGCATGTTATCTC             |
| <i>Atrmi1-2</i> LP                                            | TCAAGGGGACAGAACAACAAC             |
| <i>Atrmi1-2</i> RP                                            | TTTCAAGGGTTGAGCATATGC             |
| <i>Atrmi1-5</i> LP                                            | ACTGTCAACCCTGAACCAGAG             |
| <i>Atrmi1-5</i> RP                                            | TTTTGTACAACCTGCAGAGGG             |
| LB3                                                           | TAGCATCTGAATTCATAACCAATCTCGATACAC |
| LBb1.3                                                        | ATTTTGCCGATTTTCGGAAC              |
| GABItest1                                                     | CCCATTTGGACGTGAATGTAGACAC         |
